# Supplementary material for: A study on the prevalence and predictors of Cancer-Related Fatigue in cancer patients receiving treatment
Source: Research Square preprint supplement (doi:10.21203/rs.3.rs-7186433/v1), 2025-09-07
Supplement: Supplementary file 1 [file 5e72f137fdaa7f47d5d11216.docx]

# Supplementary Table 1: Sample Size Calculation

The sample size was calculated based on the following assumptions for estimating the prevalence of cancer-related fatigue (CRF) in cancer patients undergoing treatment:

| **Parameter** | **Value** |
| --- | --- |
| Expected prevalence of CRF | 70% |
| Confidence level | 95% |
| Absolute precision (margin of error) | 5% |
| Z-score for 95% confidence | 1.96 |
| Formula used | n = Z² × p × (1-p) / d² |
| Calculated sample size | 323 |
