# Supplementary material for: A study on the prevalence and predictors of Cancer-Related Fatigue in cancer patients receiving treatment
Source: Research Square preprint supplement (doi:10.21203/rs.3.rs-7186433/v1), 2025-09-07
Supplement: Supplementary file 2 [file c7fdc763996be84f085a5b83.docx]

# Supplementary Table 2: Quality Of Life Outcomes

| Parameter | Groups | QoL scores (by tertiles) | | |
| --- | --- | --- | --- | --- |
| **Excellent (>66)** | **Good (33-66)** | **Poor (<33)** |
| Age Group | 20-40 years | 30 | 9 | 2 |
| 40-60 years | 63 | 48 | 32 |
| 60-80 years | 33 | 45 | 58 |
| Treatment Type | Chemo | 41 | 65 | 30 |
| Both | 11 | 24 | 55 |
| Radiation | 74 | 13 | 7 |
| Diagnosis | Breast | 31 | 8 | 8 |
| Cervix | 20 | 33 | 10 |
| Colon | 8 | 5 | 4 |
| GB | 1 | 2 | 2 |
| Head & Neck | 52 | 47 | 51 |
| Lungs | 3 | 5 | 8 |
| Others | 1 | 1 | 2 |
| Ovary | 1 | 0 | 4 |
| Rectum | 9 | 1 | 3 |
| Gender | Female | 69 | 62 | 56 |
| Male | 57 | 40 | 36 |
| Stage group | I | 61 | 40 | 7 |
| II | 52 | 22 | 26 |
| III | 8 | 31 | 30 |
| IV | 5 | 9 | 29 |
| ECOG PS | 0 | 84 | 50 | 22 |
| 1 | 37 | 34 | 29 |
| 2 | 2 | 14 | 23 |
| 3 | 3 | 4 | 18 |

**Abbreviation :ECOG PS-** Eastern Cooperative Oncology Group Performance Status
