# Supplementary material for: A study on the prevalence and predictors of Cancer-Related Fatigue in cancer patients receiving treatment
Source: Research Square preprint supplement (doi:10.21203/rs.3.rs-7186433/v1), 2025-09-07
Supplement: Supplementary file 3 [file d08602c33bd48acb55ab6807.docx]

**Supplemental Table 3: Fatigue and Quality of Life Score Correlation**

| Parameter | Group | Fatigue scores in patients (numbers) | | | QoL scores in patients (numbers) | | | Correlation | |
| --- | --- | --- | --- | --- | --- | --- | --- | --- | --- |
| **Mild**  **(<33)** | **Moderate**  **(33-66)** | **Severe**  **(>66)** | **Excellent**  **(>66)** | **Good**  **(33-66)** | **Poor**  **(<33)** | **Pearson’s Coefficient*** | **P value** |
| Age | 20-40 years | 12 | 29 | 0 | 30 | 9 | 2 | -0.552 | <0.0001 |
| 40-60 years | 39 | 93 | 11 | 63 | 48 | 32 | -0.804 | <0.0001 |
| 60-80 years | 22 | 95 | 19 | 33 | 45 | 58 | -0.855 | <0.0001 |
| Treatment Type | Chemotherapy | 11 | 49 | 30 | 41 | 65 | 30 | -0.813 | <0.0001 |
| Both | 3 | 133 | 0 | 11 | 24 | 55 | -0.668 | <0.0001 |
| Radiation | 59 | 35 | 0 | 74 | 13 | 7 | -0.738 | <0.0001 |
| Diagnosis | Breast | 23 | 20 | 4 | 31 | 8 | 8 | -0.860 | <0.0001 |
| Cervix | 5 | 55 | 3 | 20 | 33 | 10 | -0.703 | <0.0001 |
| Colon | 7 | 9 | 1 | 8 | 5 | 4 | -0.862 | <0.0001 |
| GB | 1 | 4 | 0 | 1 | 2 | 2 | -0.948 | 0.014 |
| Head & Neck | 27 | 111 | 12 | 52 | 47 | 51 | -0.813 | <0.0001 |
| Lungs | 1 | 10 | 5 | 3 | 5 | 8 | -0.924 | <0.0001 |
| Others | 1 | 3 | 0 | 1 | 1 | 2 | -0.973 | 0.027 |
| Ovary | 1 | 1 | 3 | 1 | 0 | 4 | -0.921 | 0.026 |
| Rectum | 7 | 4 | 2 | 9 | 1 | 3 | -0.863 | <0.0001 |
| Gender | Female | 38 | 126 | 23 | 69 | 62 | 56 | -0.614 | <0.0001 |
| Male | 35 | 91 | 7 | 57 | 40 | 36 | -0.745 | <0.0001 |
| Stage group | 1 | 43 | 65 | 0 | 61 | 40 | 7 | -0.616 | <0.0001 |
| 2 | 30 | 64 | 6 | 52 | 22 | 26 | -0.683 | <0.0001 |
| 3 | 0 | 60 | 9 | 8 | 31 | 30 | -0.612 | <0.0001 |
| 4 | 0 | 28 | 15 | 5 | 9 | 29 | -0.787 | 0.007 |
| ECOG PS | 0 | 52 | 98 | 6 | 84 | 50 | 22 | -0.700 | <0.0001 |
| 1 | 19 | 75 | 6 | 37 | 34 | 29 | -0.548 | <0.0001 |
| 2 | 1 | 31 | 7 | 2 | 14 | 23 | -0.420 | 0.093 |
| 3 | 1 | 13 | 11 | 3 | 4 | 18 | -0.777 | <0.0001 |

* - A negative value indicates inverse correlation whereas a value closer to unity indicates stronger correlation.
